# Supplementary material for: Neuroinflammation, Energy and Sphingolipid Metabolism Biomarkers Are Revealed by Metabolic Modeling of Autistic Brains
Source: MDPI journal article supplement (doi:10.3390/biomedicines11020583), 2023-02-16

## **Supporting Information**

### **Neuroinflammation, Energy and Sphingolipid Metabolism Biomarkers are Revealed by Metabolic Modeling of Autistic Brains**

Elif Esvap, Kutlu O. Ulgen\*

*Department of Chemical Engineering, Bogazici University, Istanbul, Turkey*

\* Corresponding author. E-mail address: [ulgenk@boun.edu.tr](mailto:ulgenk@boun.edu.tr).

**Figure S1.** The distribution of the median quantile normalized gene expression values for samples aged between 2 and 14.

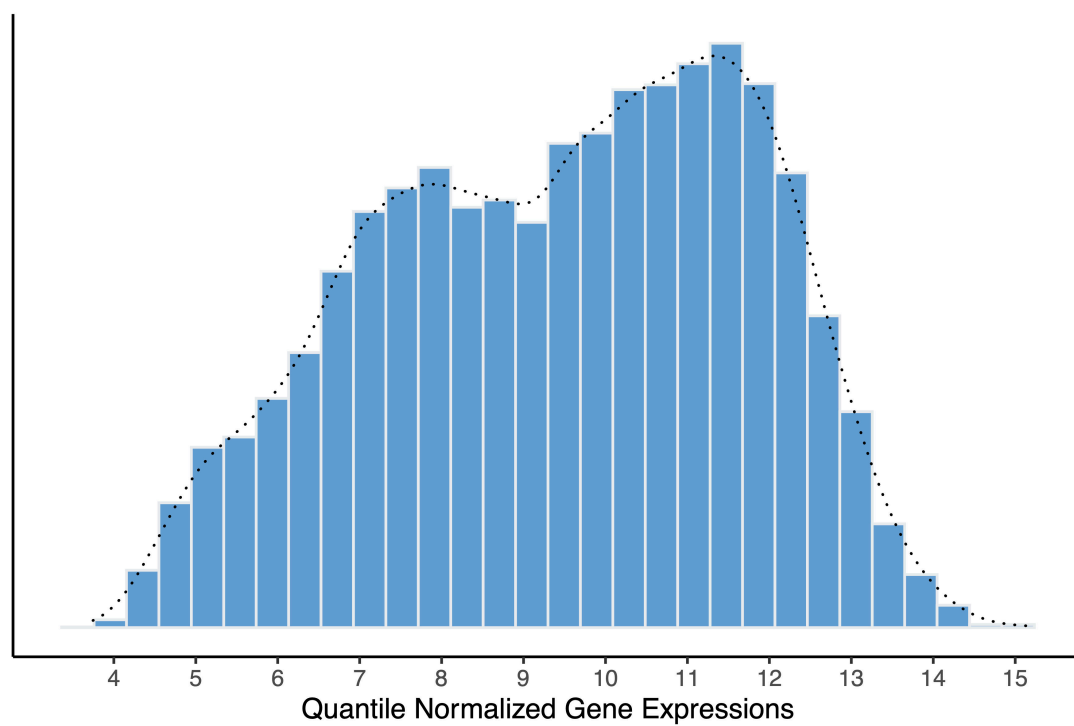

Supplement: s1 [file s1]
